# Supplementary material
Source: PubMed Central journal article supplement (PMC2975153)
Supplement: supp_M110.160069_jbc.M110.160069-1.pdf [file supp_M110.160069_jbc.M110.160069-1.pdf]

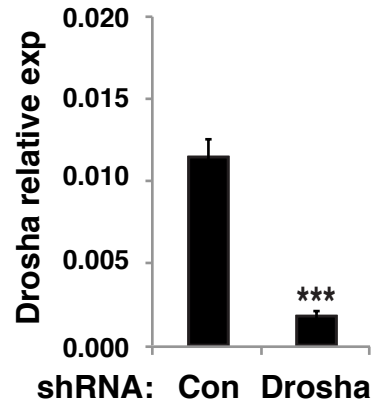

**Figure S1.** Knock-down efficiency of the Drosha shRNA construct. Total RNA was isolated from LIM 1863 cells that were stably transduced with a Drosha-targeting or control (Con) shRNA vector. Drosha expression was measured by quantitative real-time PCR using U6 snRNA as an internal standard (mean + S.D.,  $n > 3$ ).

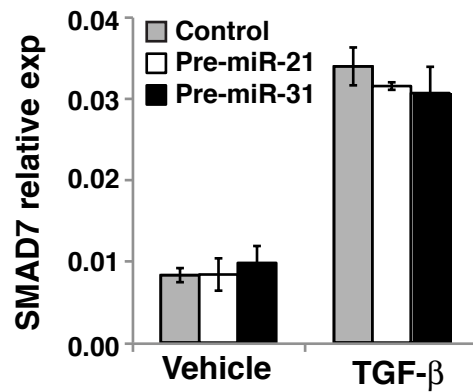

**Figure S2.** LIM 1863 organoids transfected with indicated miRNA precursors were stimulated with TGF- $\beta$  for 24 h and SMAD7 expression was measured by quantitative real-time PCR (mean + S.D,  $n > 3$ ), using U6 snRNA as an internal standard.

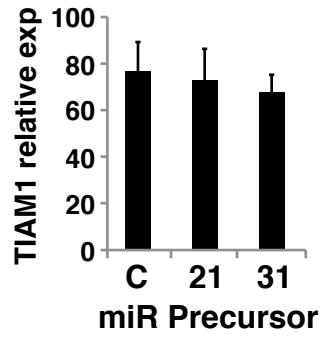

**Figure S3.** miR-21 and miR-31 did not affect TIAM1 mRNA level. Total RNA was isolated from LIM 1863 cells (as in Fig 3B) and the relative expression of TIAM1 was determined by real-time PCR, using U6 snRNA as an internal standard (mean + S.D.).
